# Supplementary material for: Molecular Engineering of Quinone-Based Nickel Complexes and Polymers for All-Organic Li-Ion Batteries
Source: MDPI journal article supplement (doi:10.3390/molecules27206805), 2022-10-11
Supplement: s1 [file s1]

Supplementary Materials for:

**Molecular Engineering of Quinone-based Nickel Complexes and Polymers for All-Organic Li-ion Batteries**

Yanislav Danchovski,<sup>1,2</sup> Hristo Rasheev,<sup>1,2</sup> Radostina Stoyanova<sup>2,\*</sup> and Alia Tadjer<sup>1,2,\*</sup>

<sup>1</sup> Faculty of Chemistry and Pharmacy, University of Sofia, 1164 Sofia, Bulgaria

<sup>2</sup> Institute of General and Inorganic Chemistry, Bulgarian Academy of Sciences, Sofia 1113, Bulgaria

e-mail: [tadjer@chem.uni-sofia.bg](mailto:tadjer@chem.uni-sofia.bg), [radstoy@svr.igic-bas.bg](mailto:radstoy@svr.igic-bas.bg)

Table S1: Calculated electrochemical potentials (at the BLYP/6-311++G\*\* level of theory) vs. Li<sup>+</sup>/Li<sup>0</sup> in solid and gas phase of some quinone-based redox-active species.

| Molecule                                                                            | $\Delta G_{sol}^0$ ,<br>kJ/mol | $\Delta E_{sol}^0$ , V | $\Delta G_{gas}^0$ ,<br>kJ/mol | $\Delta E_{gas}^0$ , V |
|-------------------------------------------------------------------------------------|--------------------------------|------------------------|--------------------------------|------------------------|
| 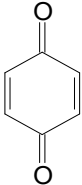  | -183.10                        | 0.949                  | -436.30                        | 2.261                  |
|  | -210.26                        | 1.090                  | -463.46                        | 2.402                  |
|  | -403.64                        | 2.092                  | -656.84                        | 3.404                  |
|  | -266.25                        | 1.380                  | -519.45                        | 2.692                  |
|  | -296.16                        | 1.535                  | -549.36                        | 2.847                  |

|                                                                                     |         |       |         |       |
|-------------------------------------------------------------------------------------|---------|-------|---------|-------|
| 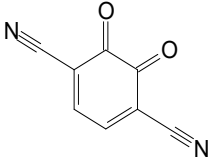   | -420.95 | 2.181 | -674.15 | 3.494 |
|    | -401.27 | 2.079 | -654.47 | 3.392 |
|    | -401.26 | 2.079 | -654.46 | 3.391 |
|    | -387.44 | 2.008 | -640.64 | 3.320 |
|  | -405.59 | 2.102 | -658.79 | 3.414 |
|  | -445.92 | 2.311 | -699.12 | 3.623 |
|  | -425.49 | 2.205 | -678.69 | 3.517 |
|  | -336.63 | 1.744 | -589.83 | 3.057 |

|    |                                                                                   |         |       |         |       |
|----|-----------------------------------------------------------------------------------|---------|-------|---------|-------|
| L1 | 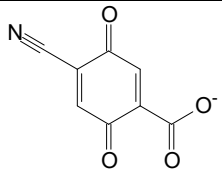 | -312.77 | 1.621 | -565.96 | 2.933 |
| L2 |  | -314.56 | 1.630 | -567.75 | 2.942 |
| L3 |  | -321.39 | 1.665 | -574.58 | 2.978 |

**Table S2:** BLA and averaged bond lengths in the lithiated Ni(II)(L1)<sub>2</sub>

| n(Li) | BLA_av | C-COO | C-CN | CO_carb | CO_quin | C-N  | Ni-O |
|-------|--------|-------|------|---------|---------|------|------|
| 0     | 0.14   | 1.49  | 1.43 | 1.29    | 1.23    | 1.17 | 1.93 |
| 2     | 0.08   | 1.47  | 1.43 | 1.31    | 1.27    | 1.17 | 1.97 |
| 4     | 0.03   | 1.45  | 1.42 | 1.31    | 1.31    | 1.18 | 1.99 |
| 6     | 0.01   | 1.46  | 1.41 | 1.32    | 1.31    | 1.19 | 2.04 |
| 8     | -0.05  | 1.42  | 1.39 | 1.34    | 1.32    | 1.20 | 2.48 |

**Table S3:** Averaged NBO charges in the lithiated Ni(II)(L1)<sub>2</sub>

| n(Li) | C_ring | O_carbox | O_quin | N      | Ni    | Li    |
|-------|--------|----------|--------|--------|-------|-------|
| 0     | 0.059  | -0.542   | -0.445 | -0.230 | 0.790 |       |
| 2     | 0.017  | -0.648   | -0.639 | -0.265 | 0.750 | 0.953 |
| 4     | -0.028 | -0.668   | -0.895 | -0.497 | 0.747 | 0.942 |
| 6     | -0.135 | -0.749   | -0.894 | -0.540 | 0.676 | 0.938 |
| 8     | -0.258 | -0.833   | -0.908 | -0.611 | 0.674 | 0.937 |

**Table S4:** BLA and averaged bond lengths in the lithiated Ni(IV)(L1)<sub>2</sub>

| n(Li) | BLA_av | C-COO | C-CN | CO_carb | CO_quin | C-N  | Ni-O | Ni-Cl |
|-------|--------|-------|------|---------|---------|------|------|-------|
| 0     | 0.14   | 1.55  | 1.43 | 1.27    | 1.23    | 1.17 | 1.97 | 2.27  |
| 2     | 0.13   | 1.52  | 1.43 | 1.27    | 1.24    | 1.17 | 2.50 | 2.27  |
| 4     | 0.07   | 1.52  | 1.42 | 1.28    | 1.29    | 1.18 | 2.49 | 6.25  |
| 6     | 0.04   | 1.50  | 1.42 | 1.29    | 1.31    | 1.18 | 2.78 | 6.23  |
| 8     | 0.02   | 1.49  | 1.41 | 1.29    | 1.31    | 1.18 | 2.82 | 6.22  |
| 10    | -0.03  | 1.42  | 1.39 | 1.34    | 1.31    | 1.19 | 2.85 | 6.29  |

**Table S5:** Averaged NBO charges in the lithiated Ni(IV)(L1)<sub>2</sub>

| n(Li) | C <sub>ring</sub> | O <sub>carbox</sub> | O <sub>quin</sub> | N      | Ni    | Cl     | Li    |
|-------|-------------------|---------------------|-------------------|--------|-------|--------|-------|
| 0     | 0.065             | -0.417              | -0.426            | -0.220 | 0.764 | -0.305 |       |
| 2     | 0.057             | -0.632              | -0.520            | -0.226 | 0.709 | -0.388 | 0.907 |
| 4     | 0.009             | -0.636              | -0.749            | -0.482 | 0.664 | -0.497 | 0.923 |
| 6     | -0.019            | -0.766              | -0.832            | -0.494 | 0.659 | -0.861 | 0.918 |
| 8     | -0.117            | -0.797              | -0.859            | -0.509 | 0.566 | -0.876 | 0.917 |
| 10    | -0.239            | -0.840              | -0.892            | -0.583 | 0.417 | -0.931 | 0.919 |

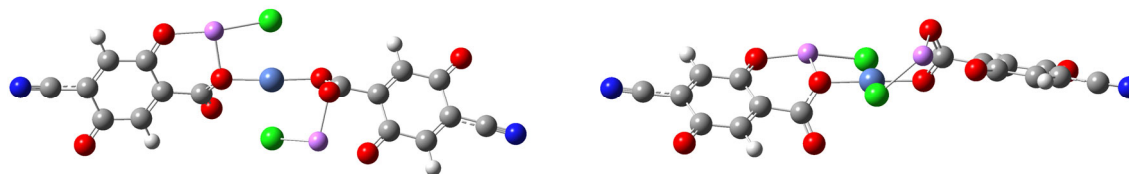**Fig. S1:** Alternative structure of the Ni(IV)<sub>2</sub>Li complex with energy only 6 kJ/mol higher than the shown in Fig. 4 – front and top view.**Table S6:** BLA and averaged bond lengths in the lithiated [Ni(II)L2]<sub>n</sub>

| n(Li) | BLA    | C-COO | CO <sub>q</sub> | CO <sub>carb</sub> | Ni <sub>O</sub> |
|-------|--------|-------|-----------------|--------------------|-----------------|
| 0Li   | 0.130  | 1.477 | 1.232           | 1.288              | 1.897           |
| 2Li   | 0.028  | 1.452 | 1.305           | 1.310              | 1.908           |
| 4Li   | 0.025  | 1.440 | 1.312           | 1.316              | 2.192           |
| 6Li   | -0.031 | 1.431 | 1.323           | 1.342              | 2.211           |
| 8Li   | -0.035 | 1.420 | 1.340           | 1.345              | 2.302           |
| 10Li  | -0.041 | 1.411 | 1.348           | 1.349              | 2.345           |

**Table S7:** BLA and averaged bond lengths in the lithiated [Ni(IV)L2]<sub>n</sub>

| n(Li) | BLA    | C-COO | CO <sub>q</sub> | CO <sub>carb</sub> | Ni <sub>O</sub> | Ni <sub>Cl</sub> |
|-------|--------|-------|-----------------|--------------------|-----------------|------------------|
| 0Li   | 0.134  | 1.479 | 1.230           | 1.281              | 1.936           | 2.210            |
| 2Li   | 0.066  | 1.463 | 1.281           | 1.282              | 1.946           | 2.209            |
| 4Li   | 0.063  | 1.448 | 1.296           | 1.289              | 2.015           | 2.218            |
| 6Li   | 0.022  | 1.431 | 1.303           | 1.301              | 2.033           | 3.495            |
| 8Li   | -0.034 | 1.422 | 1.328           | 1.343              | 2.187           | 3.614            |
| 10Li  | -0.046 | 1.406 | 1.338           | 1.350              | 2.317           | 3.687            |

**Table S8:** Averaged AIM charges in the lithiated  $[\text{Ni(II)L2}]_n$ 

| n(Li) | C_ring | O_quin | O_carbox | Ni    | Li    |
|-------|--------|--------|----------|-------|-------|
| 0Li   | 0.519  | -1.136 | -1.078   | 1.020 |       |
| 2Li   | 0.245  | -1.311 | -1.201   | 0.925 | 0.909 |
| 4Li   | 0.175  | -1.476 | -1.319   | 0.730 | 0.898 |
| 6Li   | 0.066  | -1.519 | -1.504   | 0.307 | 0.887 |
| 8Li   | -0.112 | -1.640 | -1.533   | 0.278 | 0.796 |
| 10Li  | -0.135 | -1.684 | -1.540   | 0.258 | 0.731 |

**Table S9:** Averaged AIM charges in the lithiated  $[\text{Ni(IV)L2}]_n$ 

| n(Li) | C_ring | O_quin | O_carb | Cl     | Ni    | Li    |
|-------|--------|--------|--------|--------|-------|-------|
| 0Li   | 0.481  | -1.117 | -1.052 | -0.418 | 1.246 |       |
| 2Li   | 0.380  | -1.249 | -1.156 | -0.494 | 1.155 | 0.918 |
| 4Li   | 0.350  | -1.264 | -1.218 | -0.634 | 0.856 | 0.904 |
| 6Li   | 0.327  | -1.277 | -1.261 | -0.751 | 0.529 | 0.898 |
| 8Li   | 0.315  | -1.448 | -1.364 | -0.818 | 0.400 | 0.852 |
| 10Li  | 0.199  | -1.514 | -1.593 | -0.864 | 0.307 | 0.838 |

**Table S10:** BLA and averaged bond lengths in the lithiated  $[\text{Ni(II)L3}]_n$ 

| n(Li) | BLA    | C-COO | CO_q  | CO_carb | Ni_O  | C-CN  | CN    |
|-------|--------|-------|-------|---------|-------|-------|-------|
| 0Li   | 0.130  | 1.489 | 1.226 | 1.290   | 1.906 | 1.422 | 1.169 |
| 2Li   | 0.027  | 1.467 | 1.280 | 1.307   | 1.919 | 1.419 | 1.171 |
| 4Li   | -0.015 | 1.422 | 1.295 | 1.317   | 2.029 | 1.404 | 1.186 |
| 6Li   | -0.043 | 1.404 | 1.321 | 1.325   | 2.037 | 1.400 | 1.204 |
| 8Li   | -0.055 | 1.396 | 1.332 | 1.331   | 2.083 | 1.383 | 1.257 |
| 10Li  | -0.066 | 1.376 | 1.347 | 1.336   | 2.550 | 1.397 | 1.295 |

**Table S11:** BLA and averaged bond lengths in the lithiated  $[\text{Ni(IV)L3}]_n$ 

| n(Li) | BLA    | C-COO | CO_q  | CO_carb | Ni_O  | Ni_Cl | C-CN  | C-N   |
|-------|--------|-------|-------|---------|-------|-------|-------|-------|
| 0Li   | 0.207  | 1.481 | 1.224 | 1.273   | 1.937 | 2.206 | 1.430 | 1.163 |
| 2Li   | 0.072  | 1.477 | 1.267 | 1.278   | 2.065 | 2.232 | 1.423 | 1.168 |
| 4Li   | 0.022  | 1.456 | 1.276 | 1.294   | 2.125 | 3.455 | 1.416 | 1.173 |
| 6Li   | -0.022 | 1.424 | 1.327 | 1.316   | 2.266 | 4.063 | 1.391 | 1.183 |
| 8Li   | -0.045 | 1.411 | 1.346 | 1.347   | 2.366 | 4.240 | 1.405 | 1.195 |
| 10Li  |        |       |       |         |       |       |       |       |

**Table S12:** Averaged AIM charges in the lithiated [Ni(II)L3]<sub>n</sub>

| n(Li) | C <sub>ring</sub> | O <sub>carb</sub> | O <sub>quin</sub> | N      | Ni    | Li    |
|-------|-------------------|-------------------|-------------------|--------|-------|-------|
| 0Li   | 0.630             | -1.031            | -0.988            | -0.957 | 1.010 |       |
| 2Li   | 0.547             | -1.133            | -1.348            | -1.124 | 0.931 | 0.918 |
| 4Li   | 0.470             | -1.211            | -1.388            | -1.274 | 0.731 | 0.907 |
| 6Li   | 0.404             | -1.277            | -1.486            | -1.324 | 0.626 | 0.882 |
| 8Li   | 0.351             | -1.378            | -1.587            | -1.389 | 0.400 | 0.853 |
| 10Li  | 0.254             | -1.398            | -1.641            | -1.480 | 0.290 | 0.840 |

**Table S13:** Averaged AIM charges in the lithiated [Ni(IV)L3]<sub>n</sub>

| n(Li) | C <sub>ring</sub> | O <sub>carb</sub> | O <sub>quin</sub> | Cl     | N      | Ni    | Li    |
|-------|-------------------|-------------------|-------------------|--------|--------|-------|-------|
| 0Li   | 0.547             | -0.987            | -0.922            | -0.411 | -1.142 | 1.278 |       |
| 2Li   | 0.461             | -1.065            | -1.126            | -0.530 | -1.259 | 1.129 | 0.909 |
| 4Li   | 0.440             | -1.168            | -1.302            | -0.814 | -1.406 | 1.041 | 0.903 |
| 6Li   | 0.402             | -1.232            | -1.365            | -0.898 | -1.538 | 0.623 | 0.925 |
| 8Li   | 0.373             | -1.542            | -1.487            | -0.917 | -1.581 | 0.780 | 0.896 |
| 10Li  | 0.257             | -1.750            | -1.614            | -0.936 | -1.627 | 0.422 | 0.859 |

**Table S14:** Comparison between experimental and calculated electrochemical potentials (at the BLYP/6-311++G\*\* level of theory) of quinone-based molecules vs. Li<sup>+</sup>/Li<sup>0</sup> in the solid and the gas phase.

| Compound                                            | $E_{sol}^0, V$ | $E_{gas}^0, V$ | $E_{exp}, V$ | $E_{gas} - E_{exp}, V$ |
|-----------------------------------------------------|----------------|----------------|--------------|------------------------|
| p-benzoquinone <sup>49</sup>                        | 0.87           | 2.18           | 2.75         | -0.57                  |
| Anthraquinone <sup>76</sup>                         | 0.43           | 1.74           | 2.30         | -0.56                  |
| 2-Hydroxy-1,4-naphthoquinone <sup>76</sup>          | 0.86           | 2.17           | 2.40         | -0.23                  |
| 2,3-Diamino-1,4-naphthoquinone <sup>77</sup>        | 0.56           | 1.87           | 2.25         | -0.38                  |
| 1,1'-Iminodanthroquinone <sup>76,a</sup>            | 0.44           | 1.76           | 2.05         | -0.29                  |
| 1,4-benzoquinone dimer <sup>78</sup>                | 1.52           | 2.84           | 3.00         | -0.16                  |
| 1H-naphtho[2,3-d]imidazole-4,9-dione <sup>77</sup>  | 0.85           | 2.16           | 2.44         | -0.28                  |
| Lithium azobenzene-4,4'-dicarboxylate <sup>76</sup> | 0.36           | 1.67           | 1.50         | 0.17                   |

<sup>a</sup> Calculations are performed on 1-aminoanthraquinone to reduce computational effort

#### References as cited in the main text:

49. Kwon, J.E.; Hyun, C.-S.; Ryu, Y.J.; Lee, J.; Min, D.J.; Park, M.J.; An, B.-K.; Park, S.Y. Triptycene-Based Quinone Molecules Showing Multi-Electron Redox Reactions for Large Capacity and High Energy Organic Cathode Materials in Li-Ion Batteries. *J. Mater. Chem. A* **2018**, *6*, 3134–3140. <https://doi.org/10.1039/C7TA09968A>.
76. Xu, D.; Liang, M.; Qi, S.; Sun, W.; Lv, L.-P.; Du, F.-H.; Wang, B.; Chen, S.; Wang, Y.; Yu, Y. The Progress and Prospect of Tunable Organic Molecules for Organic Lithium-Ion Batteries. *ACS Nano* **2021**, *15*, 47–80.
77. Lee, J.; Kim, H.; Park, M.J.; Long-life, high-rate lithium-organic batteries based on naphthoquinone derivatives. *Chem. Mater.* **2016**, *28*, 2408–2416.
78. Yao, Z.; Tang, W.; Wang, X.; Wang, C.; Yang, C.; Fan, C.; Synthesis of 1,4-benzoquinone dimer as a high-capacity (501 mAhg<sup>-1</sup>) and high-energy-density (> 1000 Whkg<sup>-1</sup>) organic cathode for organic Li-Ion full batteries. *J. Power Sources* **2020**, *448*, 227456.
